# Supplementary material
Source: publisher figshare collection journal article supplement (https://acs.figshare.com/ndownloader/files/21244923)
Supplement: Supplementary file 1 [file 21244923]

## Supporting Information for Publication

### Tunable Dual Visible and Near-Infrared Persistent Luminescence in Doped Zinc Gallogermanate Nanoparticles for Simultaneous Photosensitization and Bioimaging

Liya Li, Fengjuan Pan, Peter A. Tanner\* and Ka-Leung Wong\*

Department of Chemistry, Hong Kong Baptist University, Kowloon Tong, Hong Kong S.A.R., China

E-mail addresses: P.A.T.: peter.a.tanner@gmail.com; K.-L. W. klwong@hkbu.edu.hk

| Table of Contents                                                                                                                                                                                                                                                                                                                                   | Page |
|-----------------------------------------------------------------------------------------------------------------------------------------------------------------------------------------------------------------------------------------------------------------------------------------------------------------------------------------------------|------|
| <b>Table S1.</b> Main bands in the FT-IR and Raman spectra in zinc gallogermanates and their assignments from the literature.                                                                                                                                                                                                                       | S-3  |
| <b>Figure S1.</b> XRD powder diffraction patterns of zinc gallogermanate (1-1-1).                                                                                                                                                                                                                                                                   | S-4  |
| <b>Figure S2.</b> Photoluminescence spectra of samples 1-1-1 prepared at 1000 and 1225 °C using 255 nm excitation.                                                                                                                                                                                                                                  | S-5  |
| <b>Figure S3.</b> Emission spectra of 1-0-0, 0-1-0 and 1-1-0 samples under 255 nm excitation.                                                                                                                                                                                                                                                       | S-6  |
| <b>Figure S4.</b> (a) Emission spectra of sample 1-0-0, 0-1-0 and 1-1-1 under the 255 nm excitation; (b) Emission spectra of sample 0.2-1.4-2.2, 1-1-1 and 1.2-0.9-0.7 under 255 nm excitation; Comparison of integrated emission intensity of various samples under the 255 and 295 excitation.                                                    | S-7  |
| <b>Figure S5.</b> Circa 10 K emission spectra of 1-1-1 under different excitation wavelengths.                                                                                                                                                                                                                                                      | S-8  |
| <b>Figure S6.</b> Deconvoluted emission of 1-1-1 into two Gaussians under various excitation wavelengths.                                                                                                                                                                                                                                           | S-9  |
| <b>Figure S7.</b> Excitation spectra of 1-1-1 when monitoring different emission wavelengths.                                                                                                                                                                                                                                                       | S-10 |
| <b>Figure S8.</b> 255 nm excited emission spectra of zinc gallogermanates $\alpha\text{ZnGa}_2\text{O}_4-\beta\text{Zn}_2\text{GeO}_4-\gamma\text{GeO}_2$ , $\alpha, \beta, \gamma \neq 0$ . Each spectrum is fitted by two Gaussian bands (green) with the sum indicated by a red line.                                                            | S-11 |
| <b>Figure S9.</b> ESR spectra at 100 K of samples 1-1-0, 1-0-0, 1-1-1, 0-1-1, 0-1-0.                                                                                                                                                                                                                                                                | S-12 |
| <b>Figure S10.</b> Dependence of PL spectra on different Ge/Ga ratio.                                                                                                                                                                                                                                                                               | S-13 |
| <b>Figure S11.</b> Examples of biexponential decay curve fits using excitation with a ~2 microsecond pulsed laser: (a) excitation at 240 nm and emission at 400 nm; (b) excitation at 325 nm and emission at 580 nm. Examples of hyperbolic fits: (c) excitation at 240 nm and emission at 400 nm; (d) excitation at 325 nm and emission at 580 nm. | S-14 |

|                                                                                                                                                                                                                                                                                                                                                                                                                                                                                                                                                                                                                                                                                    |      |
|------------------------------------------------------------------------------------------------------------------------------------------------------------------------------------------------------------------------------------------------------------------------------------------------------------------------------------------------------------------------------------------------------------------------------------------------------------------------------------------------------------------------------------------------------------------------------------------------------------------------------------------------------------------------------------|------|
| <b>Figure S12.</b> Persistent luminescence spectra of sample 1-1-1 using different excitation wavelengths.                                                                                                                                                                                                                                                                                                                                                                                                                                                                                                                                                                         | S-15 |
| <b>Figure S13.</b> (a) Biexponential data fit 0-3600 s to persistent luminescence decay in Figure 7: sample 1-1-1 after 10 min excitation at 295 nm. (b) Hyperbolic data fit 0-3600 s to persistent luminescence decay in Figure 7: sample 1-1-1 after 10 min excitation at 295 nm. Persistent luminescence decay curve of sample 1-1-1 after 5 min excitation at 295 nm: (c) from 100 s to 300 s; (d) from 300 s to 500 s.                                                                                                                                                                                                                                                        | S-16 |
| <b>Figure S14.</b> Persistent luminescence spectra of 1-0-1, 0-1-1 and 1-1-0 measured at 1 min after 10 min excitation at 295 nm.                                                                                                                                                                                                                                                                                                                                                                                                                                                                                                                                                  | S-17 |
| <b>Figure S15.</b> Co-doped 1-1-1 sample with $\text{Cr}^{3+}$ (0.5 mol%) with or without 1.5 mol% $\text{Yb}^{3+}$ : (a) NIR (698 nm) persistent luminescence decay curves; (b) blue (465 nm) persistent luminescence decay curves.                                                                                                                                                                                                                                                                                                                                                                                                                                               | S-18 |
| <b>Figure S16.</b> Synthesized nanoparticles to demonstrate the change in size without (a) and with (b) $\text{Yb}^{3+}$ co-doping. The approximate sizes are 80 nm in (a) and 30 nm in (b).                                                                                                                                                                                                                                                                                                                                                                                                                                                                                       | S-19 |
| <b>Figure S17.</b> (a) Blue persistent luminescence decay curves of co-doped $\text{Zn}_3\text{Ga}_2\text{Ge}_2\text{O}_{10}:\text{Cr}^{3+}$ (ZGGO: C) samples: $\text{Zn}_3\text{Ga}_2\text{Ge}_2\text{O}_{10}:\text{Cr}^{3+}$ , $\text{Yb}^{3+}$ (ZGGO: CY), $\text{Zn}_3\text{Ga}_2\text{Ge}_2\text{O}_{10}:\text{Cr}^{3+}$ , $\text{Yb}^{3+}$ , $\text{Pr}^{3+}$ (ZGGO: CYP), $\text{Zn}_3\text{Ga}_2\text{Ge}_2\text{O}_{10}:\text{Cr}^{3+}$ , $\text{Yb}^{3+}$ , $\text{Er}^{3+}$ (ZGGO: CYE), and $\text{Zn}_3\text{Ga}_2\text{Ge}_2\text{O}_{10}:\text{Cr}^{3+}$ , $\text{Yb}^{3+}$ , $\text{Pr}^{3+}$ , $\text{Er}^{3+}$ (ZGGO: CYPE) under 254 nm excitation for 5 min.  | S-19 |
| <b>Figure S18.</b> NIR persistent luminescence decay curves of co-doped ZGGO samples: $\text{Zn}_3\text{Ga}_2\text{Ge}_2\text{O}_{10}:\text{Cr}^{3+}$ (ZGGO: C), $\text{Zn}_3\text{Ga}_2\text{Ge}_2\text{O}_{10}:\text{Cr}^{3+}$ , $\text{Yb}^{3+}$ (ZGGO: CY), $\text{Zn}_3\text{Ga}_2\text{Ge}_2\text{O}_{10}:\text{Cr}^{3+}$ , $\text{Yb}^{3+}$ , $\text{Pr}^{3+}$ (ZGGO: CYP), $\text{Zn}_3\text{Ga}_2\text{Ge}_2\text{O}_{10}:\text{Cr}^{3+}$ , $\text{Yb}^{3+}$ , $\text{Er}^{3+}$ (ZGGO: CYE), and $\text{Zn}_3\text{Ga}_2\text{Ge}_2\text{O}_{10}:\text{Cr}^{3+}$ , $\text{Yb}^{3+}$ , $\text{Pr}^{3+}$ , $\text{Er}^{3+}$ (ZGGO: CYPE) under 274 nm excitation for 5 min. | S-20 |
| <b>Table S2.</b> Relationship between phase ratio and Ga/Ge ratio.                                                                                                                                                                                                                                                                                                                                                                                                                                                                                                                                                                                                                 | S-20 |
| <b>Table S3.</b> Summary of defect sites found or inferred to be present in ZGGO : $\text{Cr}^{3+}$                                                                                                                                                                                                                                                                                                                                                                                                                                                                                                                                                                                | S-21 |
| <b>Figure S19.</b> CIE diagram for samples of 1-1-1 doped with 0.01 mol% and 1.0 mol% $\text{Cr}^{3+}$ .                                                                                                                                                                                                                                                                                                                                                                                                                                                                                                                                                                           | S-22 |
| <b>Figure S20.</b> Thermoluminescence experiments for undoped sample 1-1-1.                                                                                                                                                                                                                                                                                                                                                                                                                                                                                                                                                                                                        | S-22 |
| <b>References</b>                                                                                                                                                                                                                                                                                                                                                                                                                                                                                                                                                                                                                                                                  | S-23 |

**Table S1.** Main bands in the FT-IR and Raman spectra in zinc gallogermanates and their assignments from the literature.<sup>S1-S4</sup>

| Composition                      | Type of vibration                                                    | FT-IR<br>(cm <sup>-1</sup> ) | Raman<br>(cm <sup>-1</sup> ) |
|----------------------------------|----------------------------------------------------------------------|------------------------------|------------------------------|
| ZnGa <sub>2</sub> O <sub>4</sub> | [Ga-O-Zn]                                                            |                              | 609, 714                     |
|                                  | [Ga-O]<br>(stretching vibration)                                     | 565                          |                              |
| Zn <sub>2</sub> GeO <sub>4</sub> | [Ge-O-Zn symmetric mode]                                             |                              | 745                          |
|                                  | [Ge-O-Zn asymmetric mode]                                            |                              | 777                          |
|                                  | [Ge-O-Ge]<br>(bending vibration)                                     | 523                          |                              |
|                                  | tetrahedral [GeO <sub>4</sub> ]<br>(Ge-O bonds stretching vibration) | 733                          | 802                          |
| GeO <sub>2</sub>                 | tetrahedral [GeO <sub>4</sub> ]<br>(Ge-O stretching vibration)       | 865                          | 885                          |
|                                  | tetrahedral [GeO <sub>4</sub> ]<br>(Ge-Ge stretching vibration)      |                              | 521                          |

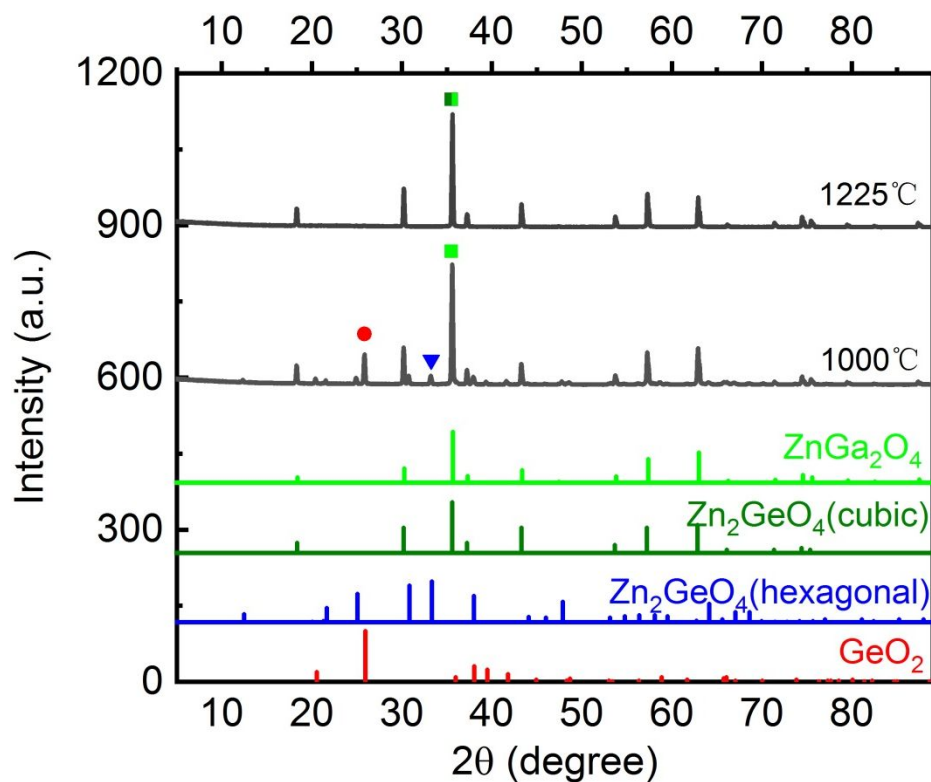

**Figure S1.** XRD powder diffraction patterns of zinc gallogermanate (1-1-1) synthesized at 1000 °C and 1225 °C. The green, dark green, blue and red lines represent ZnGa<sub>2</sub>O<sub>4</sub> (PDF# 38-1240), cubic Zn<sub>2</sub>GeO<sub>4</sub> (PDF#25-1018) hexagonal Zn<sub>2</sub>GeO<sub>4</sub> (PDF#11-0687) and GeO<sub>2</sub> (PDF#43-1016), respectively.

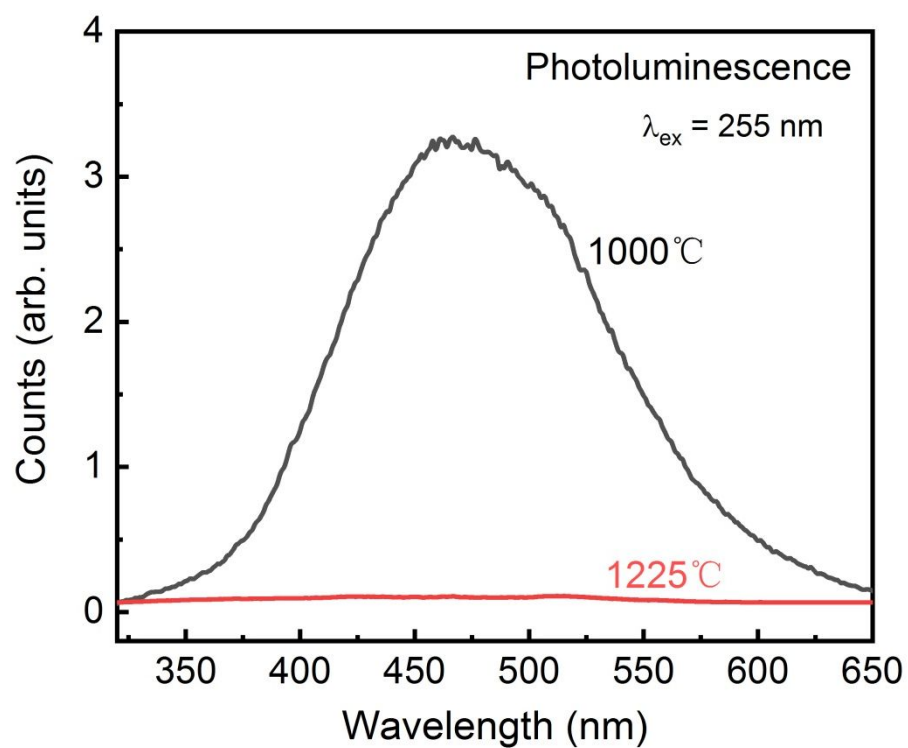

**Figure S2.** Photoluminescence spectra of samples 1-1-1 prepared at 1000 and 1225 °C using 255 nm excitation.

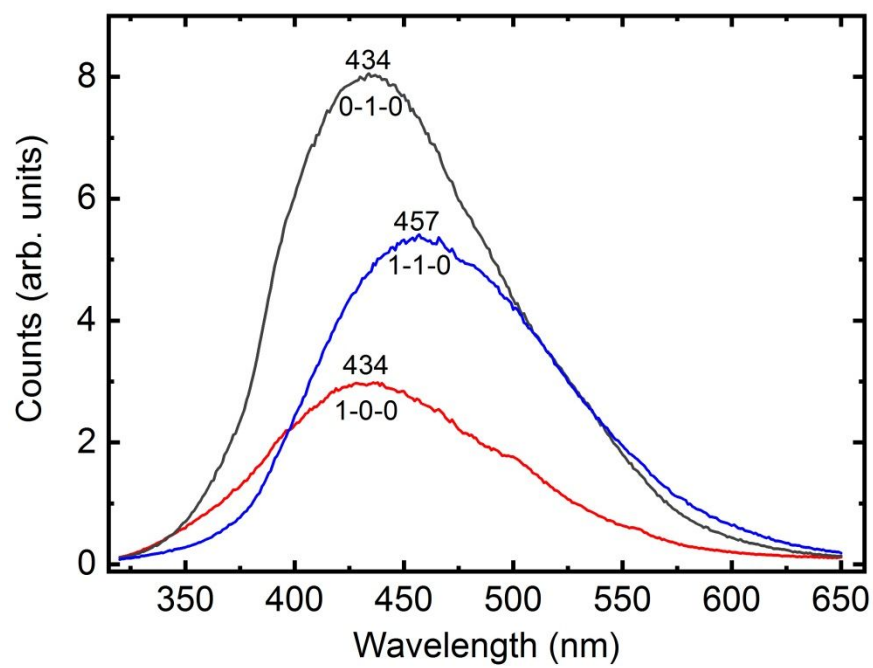

**Figure S3.** Emission spectra of 1-0-0, 0-1-0 and 1-1-0 samples under 255 nm excitation.

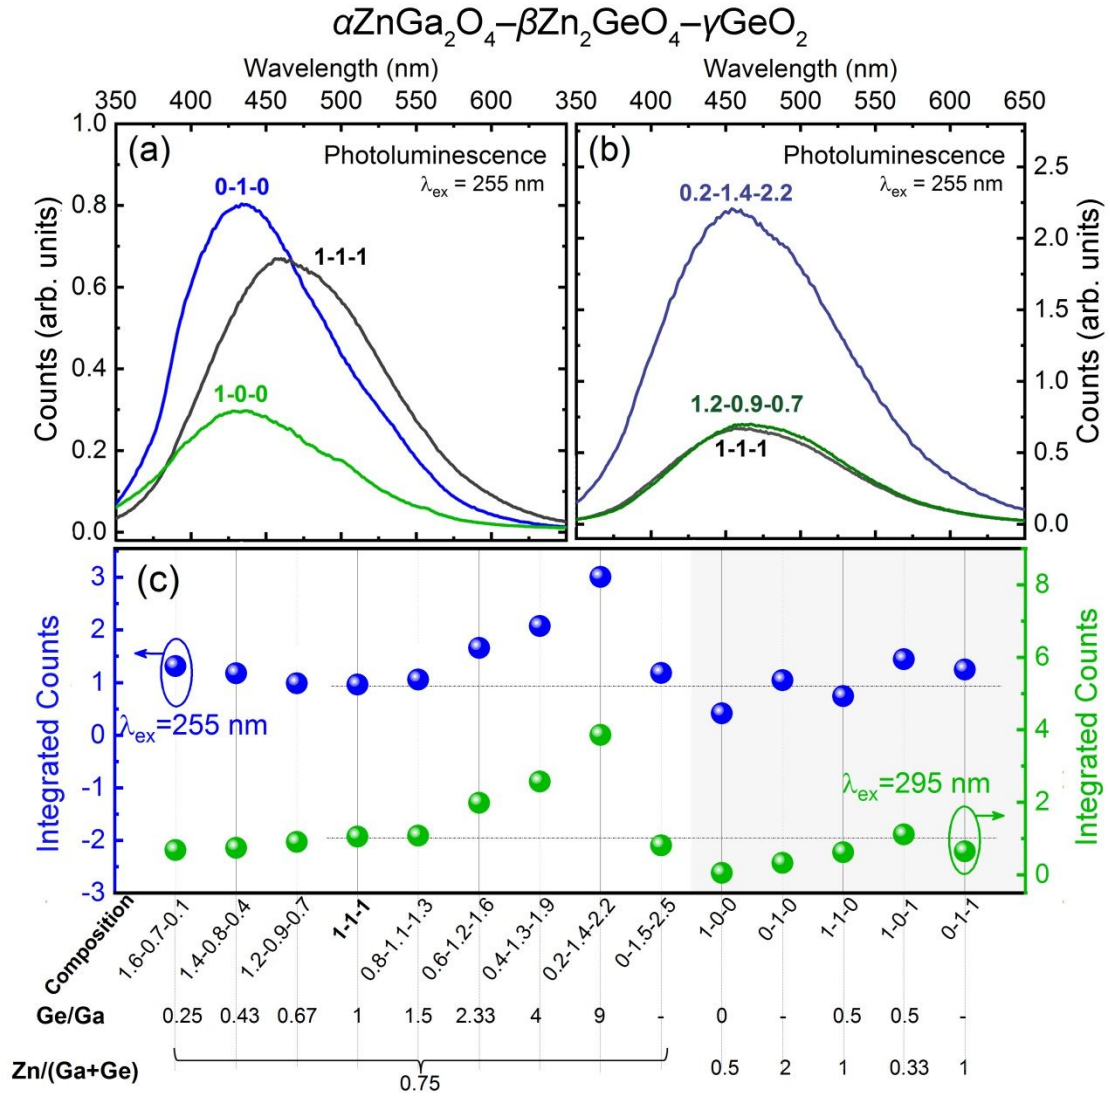

**Figure S4.** (a) Emission spectra of sample 1-0-0, 0-1-0 and 1-1-1 under the 255 nm excitation; (b) Emission spectra of sample 0.2-1.4-2.2, 1-1-1 and 1.2-0.9-0.7 under 255 nm excitation; (c) Comparison of integrated emission intensity of various samples under 255 and 295 excitation.

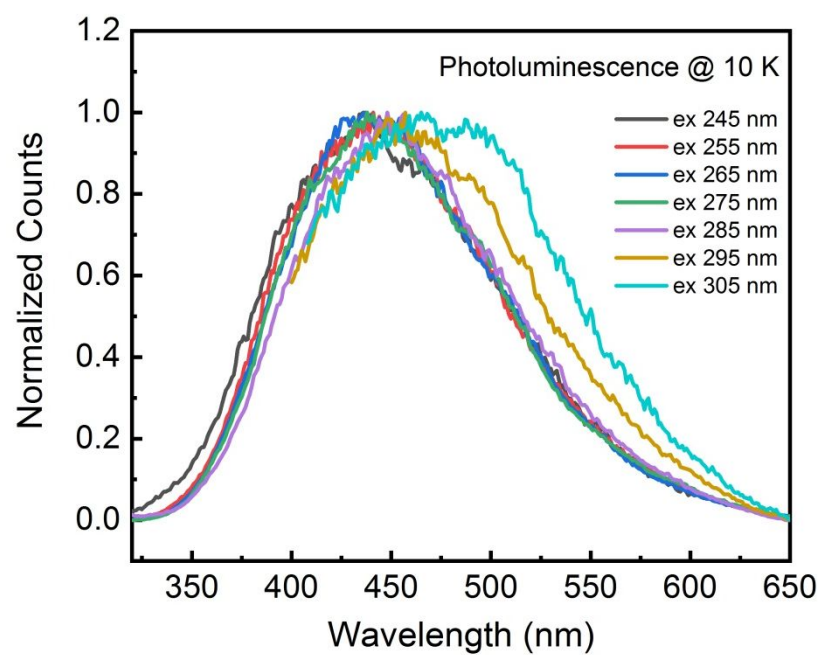

**Figure S5.** Circa 10 K emission spectra of 1-1-1 under different excitation wavelengths.



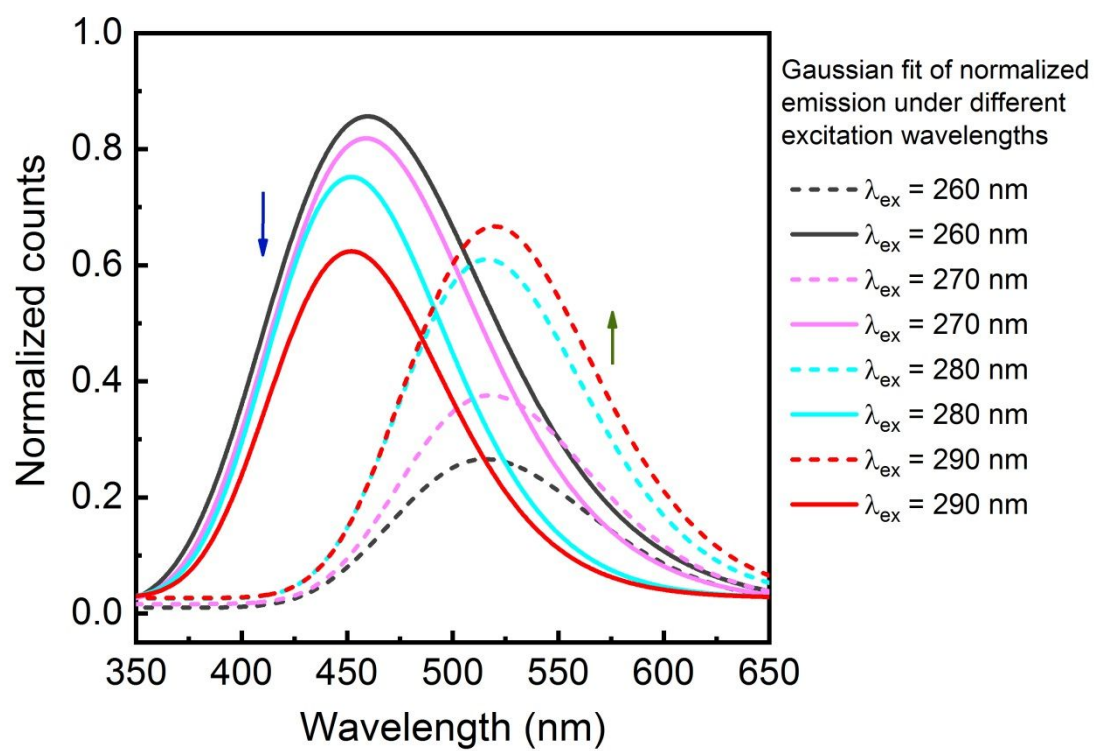

**Figure S6.** Deconvoluted emission of 1-1-1 into two Gaussians under various excitation wavelengths.

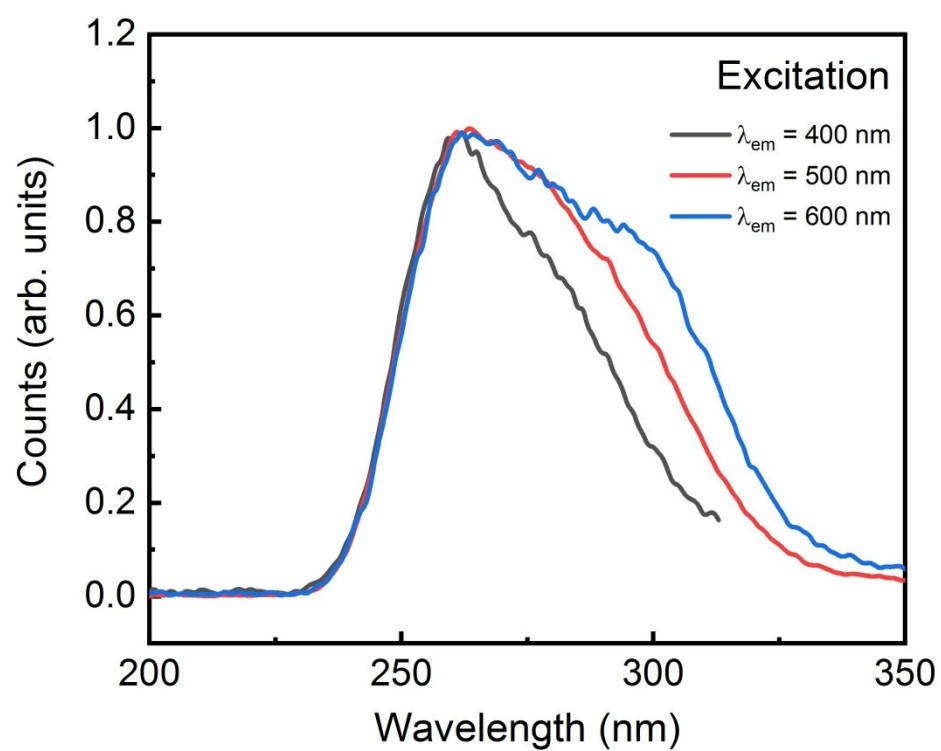

**Figure S7.** Excitation spectra of 1-1-1 when monitoring different emission wavelengths.

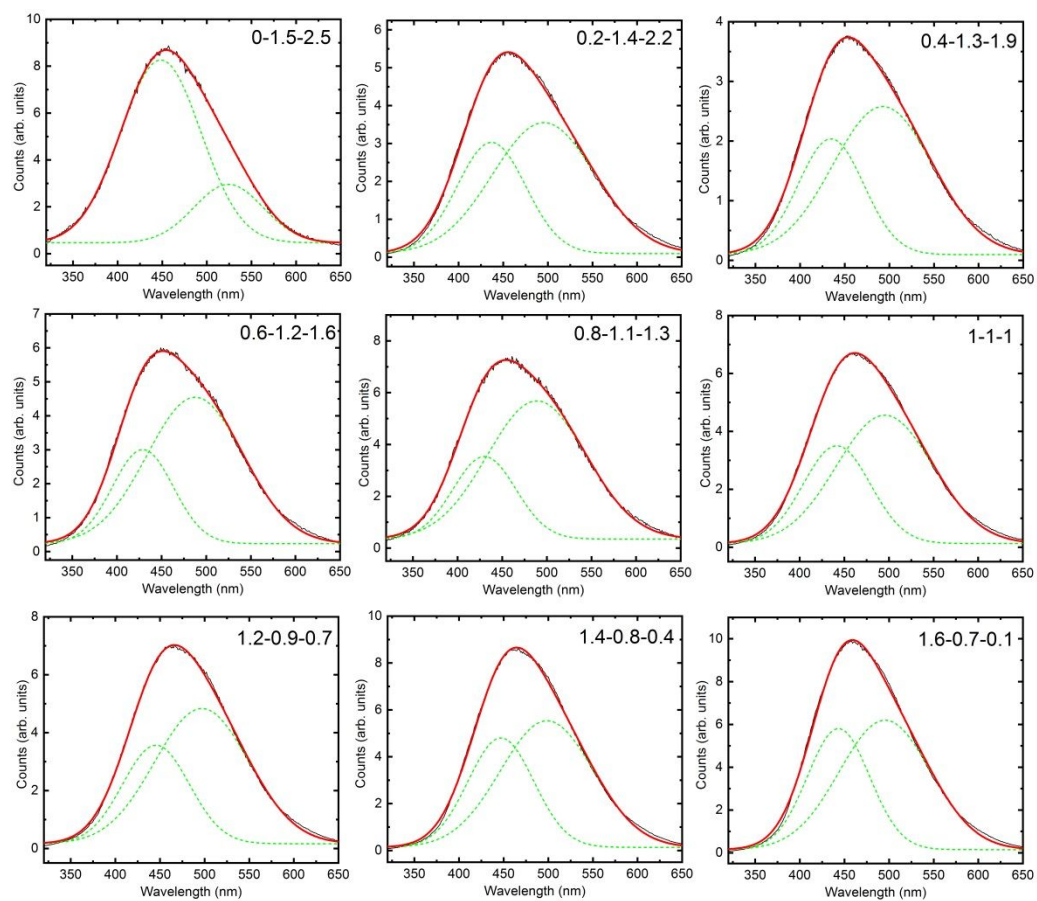

**Figure S8.** 255 nm excited emission spectra of zinc gallogermanates  $\alpha\text{ZnGa}_2\text{O}_4$ – $\beta\text{Zn}_2\text{GeO}_4$ – $\gamma\text{GeO}_2$ ,  $\alpha, \beta, \gamma \neq 0$ . Each spectrum is fitted by two Gaussian bands (green) with the sum indicated by a red line.

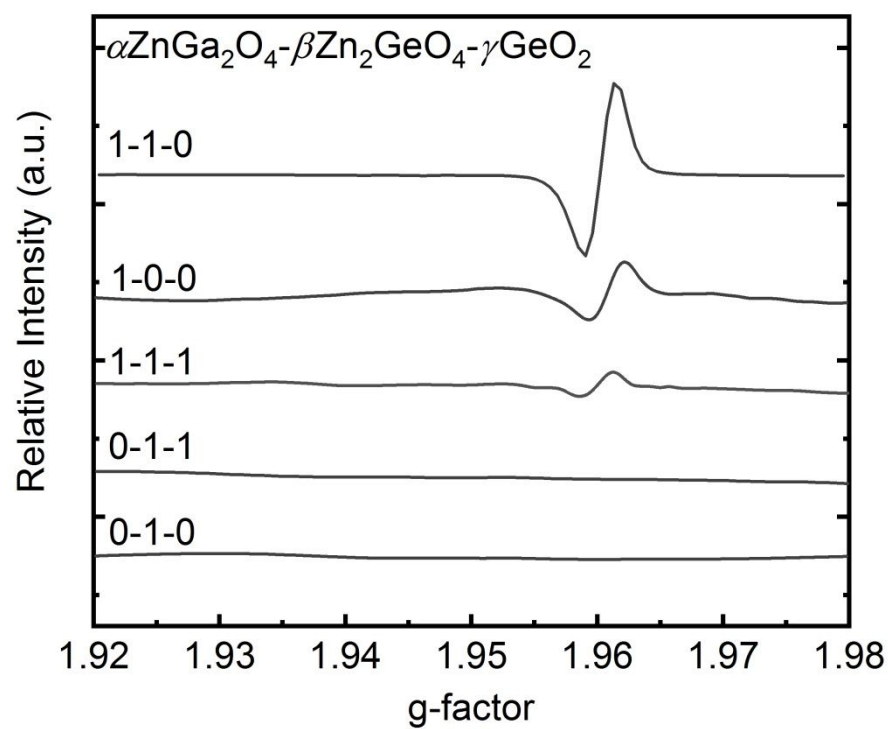

**Figure S9.** ESR spectra at 100 K of samples 1-1-0, 1-0-0, 1-1-1, 0-1-1, 0-1-0.

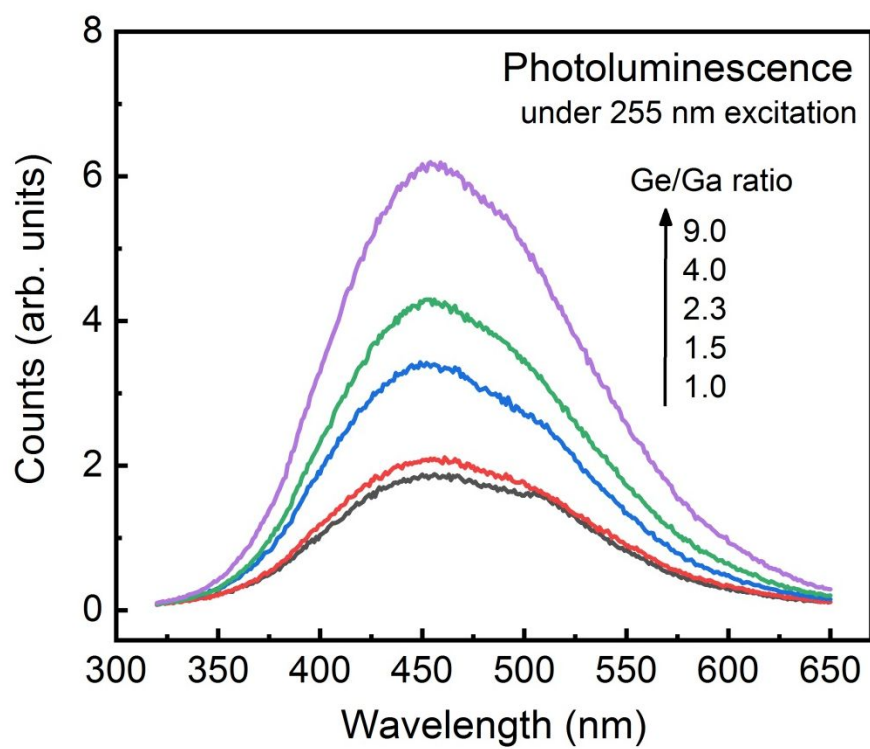

**Figure S10.** Dependence of PL spectra on different Ge/Ga ratio.

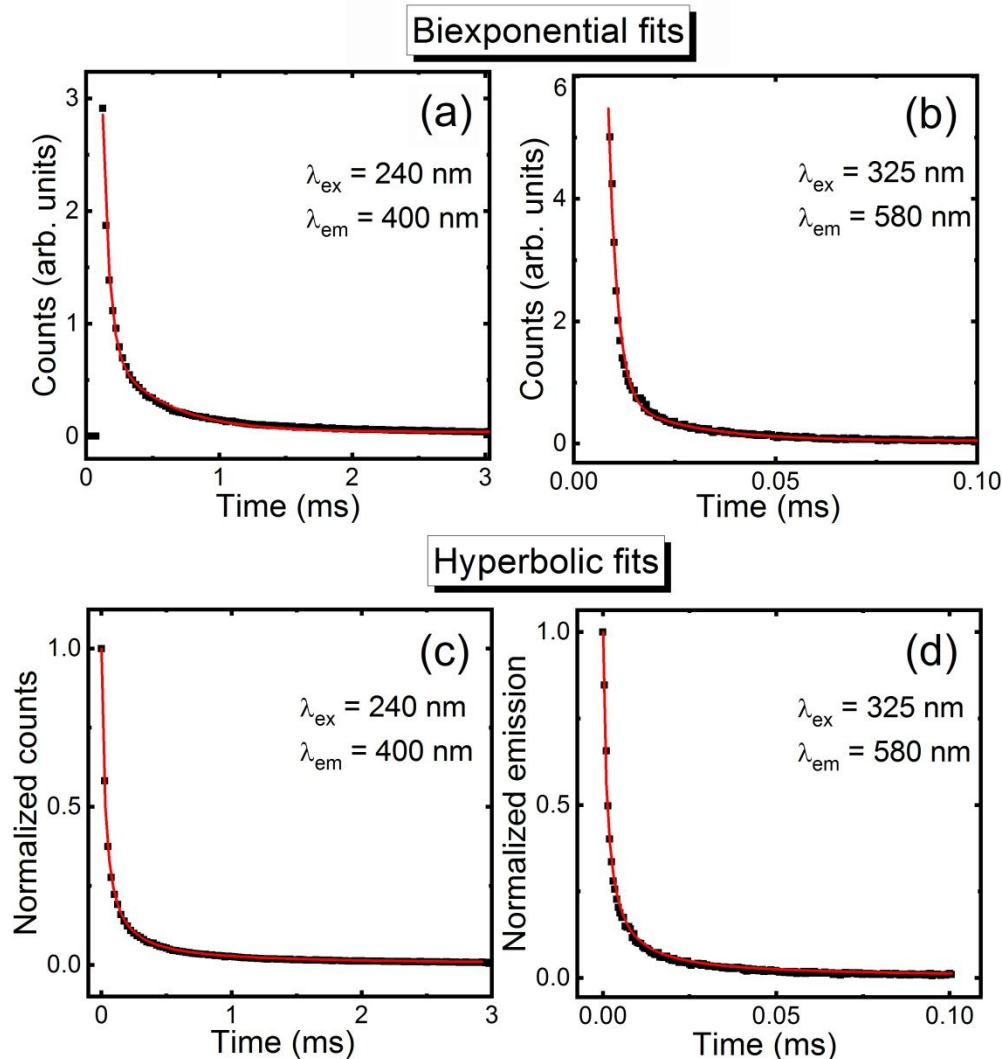

**Figure S11.** Examples of biexponential decay curve fits using excitation with a  $\sim 2$  microsecond pulsed laser: (a) excitation at 240 nm and emission at 400 nm; Fitting  $y = 387 \pm 16 + (9838 \pm 322) \times \exp(-x/(0.44 \pm 0.01)) + (286284 \pm 15847) \times \exp(-x/0.048 \pm 0.001)$ ,  $R^2_{\text{adj}} = 0.98762$ , with time in ms; (b) excitation at 325 nm and emission at 580 nm: Fitting  $y = 44 \pm 13 + (1092 \pm 172) \times \exp(-x/(18.9 \pm 2.6)) + (209146 \pm 26684) \times \exp(-x/2.24 \pm 0.08)$ ,  $R^2_{\text{adj}} = 0.98762$ , with time in  $\mu\text{s}$ . Examples of hyperbolic fits: (c) excitation at 240 nm and emission at 400 nm; Fitting  $y = 1/(1 + (34.09 \pm 0.27)x)$ ,  $R^2_{\text{adj}} = 0.99821$ , with  $B$  in  $(\text{ms})^{-1}$ ; (d) excitation at 325 nm and emission at 580 nm: Fitting  $y = 1/(1 + (778 \pm 12)x)$ ,  $R^2_{\text{adj}} = 0.99821$ , with  $B$  in  $(\text{ms})^{-1}$ .

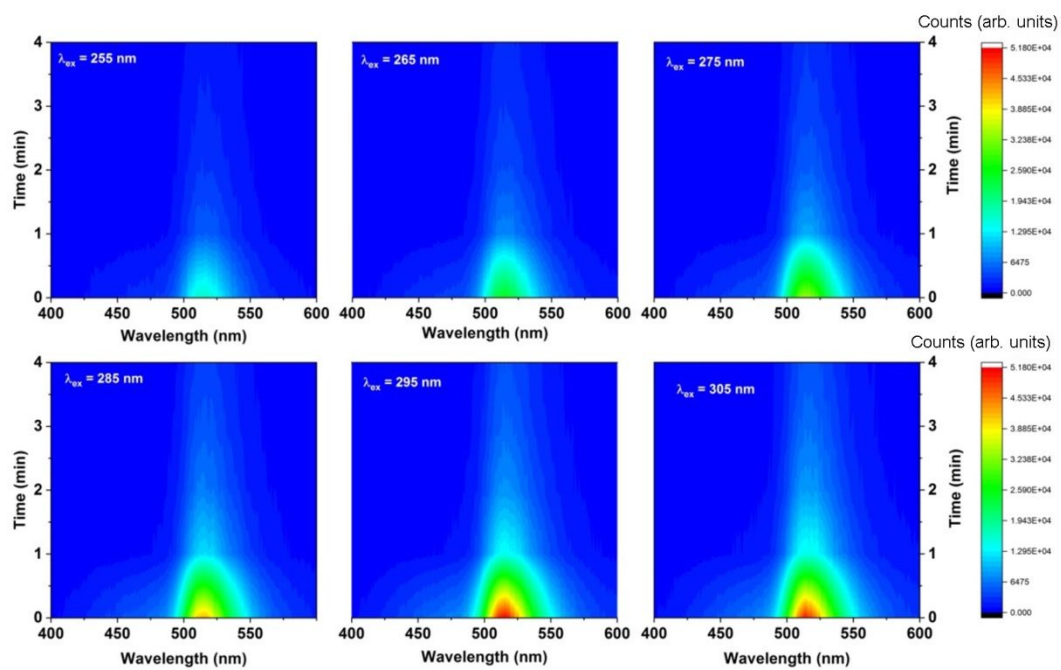

**Figure S12.** Persistent luminescence spectra of sample 1-1-1 using different excitation wavelengths.

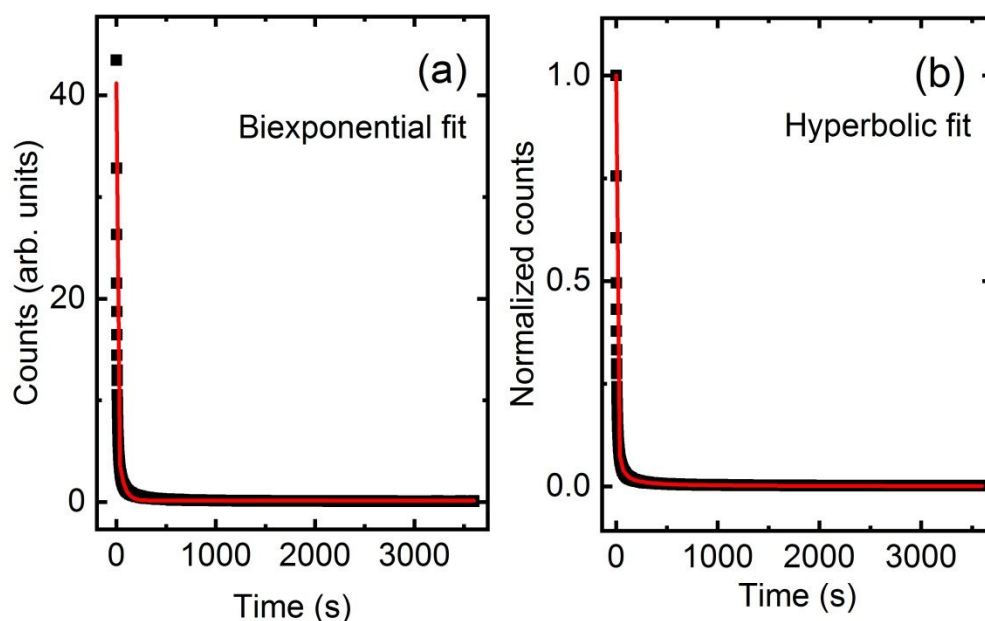

**Figure S13.** (a) Biexponential data fit 0-3600 s to persistent luminescence decay in Figure 7: sample 1-1-1 after 10 min excitation at 295 nm.

Fits to persistent luminescence decay in Figure 7:

Time: 0-3600 s

$$y = (1310 \pm 22) + (340877 \pm 1111) \times \exp[-x/(4.15 \pm 0.03)] + (69442 \pm 662) \times \exp[-x/(51.9 \pm 0.5)],$$

$$R^2_{\text{adj}} = 0.9906$$

$$\text{Fraction of emission with shorter lifetime} = A_1\tau_1 / (A_1\tau_1 + A_2\tau_2) = 0.72$$

Time 101-3600 s

$$y = (733 \pm 4) + (20057 \pm 204) \times \exp[-x/(96 \pm 1)] + (4017 \pm 58) \times \exp[-x/(586 \pm 7)], R^2_{\text{adj}} = 0.9927$$

$$\text{Fraction of emission with shorter lifetime} = 0.45$$

Time 201-3600 s

$$y = (700 \pm 5) + (13099 \pm 355) \times \exp[-x/(135 \pm 3)] + (3059 \pm 78) \times \exp[-x/(709 \pm 15)], R^2_{\text{adj}} = 0.9848$$

$$\text{Fraction of emission with shorter lifetime} = 0.45$$

Time 301-3600 s

$$y = (681 \pm 7) + (8879 \pm 450) \times \exp[-x/(177 \pm 8)] + (2520 \pm 116) \times \exp[-x/(805 \pm 28)], R^2_{\text{adj}} = 0.9741$$

$$\text{Fraction of emission with shorter lifetime} = 0.44$$

(b) Hyperbolic data fit 0-3600 s to persistent luminescence decay in Figure 7: sample 1-1-1 after 10 min excitation at 295 nm.

Fits to persistent luminescence decay in Figure 7:

Time: 0-3600 s

$$y = 1/(1 + (0.3397 \pm 0.0003)x), R^2_{\text{adj}} = 0.99931.$$



Time 101-3600 s

$$y = 1/(1+(0.00836 \pm 0.00003)x), R^2_{\text{adj}} = 0.97137.$$

Time 201-3600 s

$$y = 1/(1+(0.00347 \pm 0.00001)x), R^2_{\text{adj}} = 0.95399.$$

Time 301-3600 s

$$y = 1/(1+(0.00245 \pm 0.00001)x), R^2_{\text{adj}} = 0.91911.$$

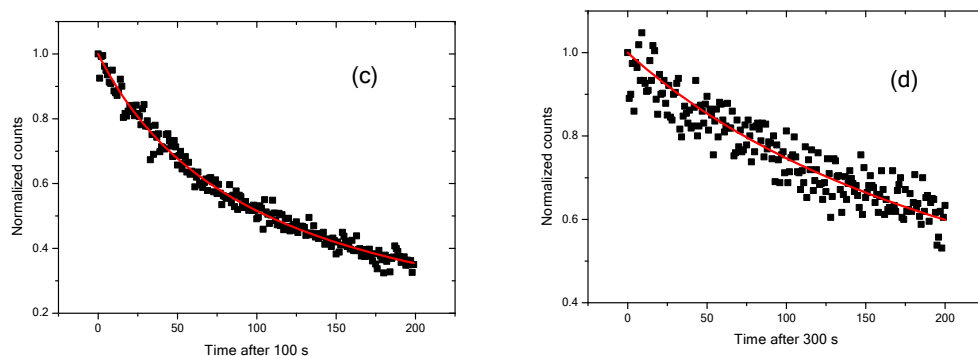

**Figure S13.** Persistent luminescence decay curve of sample 1-1-1 after 5 min excitation at 295 nm: (c) from 100 s to 300 s; (d) from 300 s to 500 s. Fitting with the one-parameter DHARA function, Eq. (4), without refining the value of  $c$  (taken as  $c = 1.1$ ) gives the values of  $k$  of  $0.00972 \text{ s}^{-1}$  (in c) and  $0.00344 \text{ s}^{-1}$  (in d). These correspond to lifetimes  $\tau(100-300) = 103 \text{ s}$  and  $\tau(300-500) = 291 \text{ s}$ .

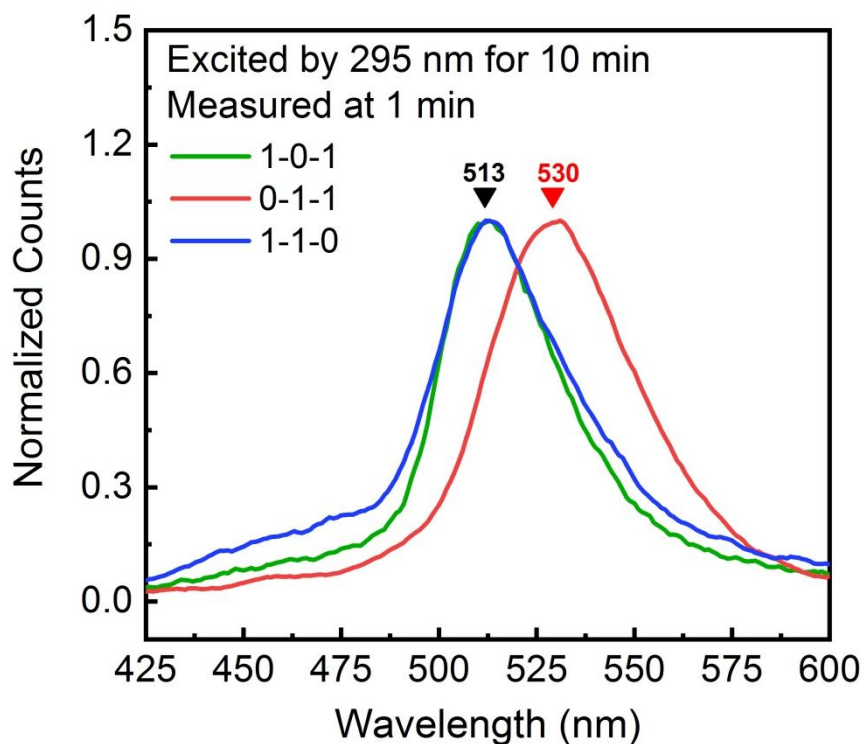

**Figure S14.** Persistent luminescence spectra of 1-0-1, 0-1-1 and 1-1-0 measured at 1 min after 10 min excitation at 295 nm.

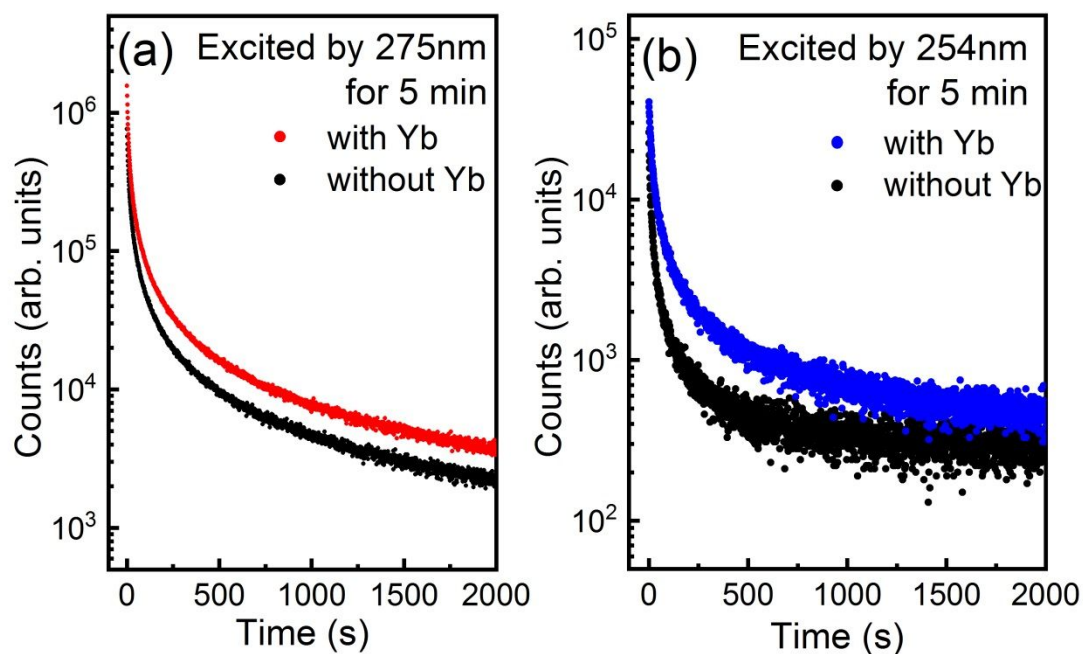

**Figure S15.** Co-doped 1-1-1 sample with  $\text{Cr}^{3+}$  (0.5 mol%) with or without 1.5 mol%  $\text{Yb}^{3+}$ : (a) NIR (698 nm) persistent luminescence decay curves; (b) blue (465 nm) persistent luminescence decay curves.

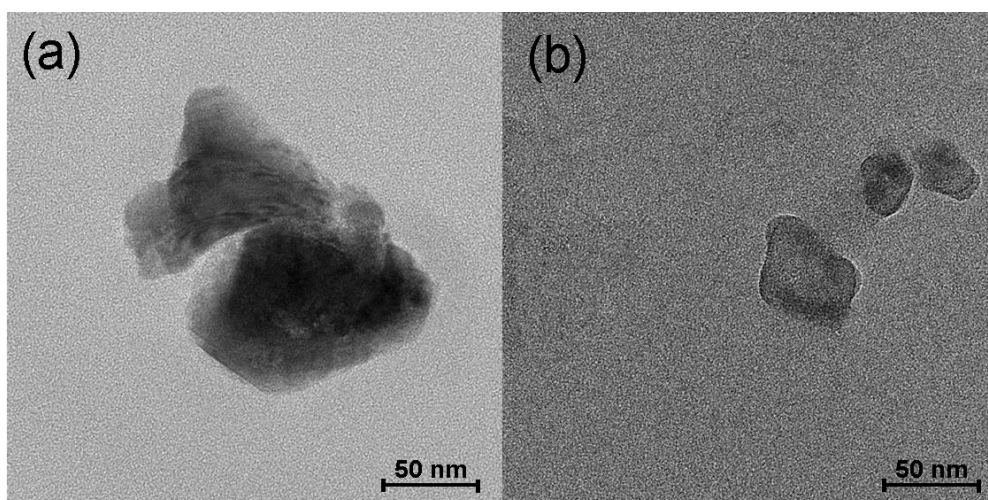

**Figure S16.** Synthesized nanoparticles to demonstrate the change in size without (a) and with (b)  $\text{Yb}^{3+}$  co-doping. The approximate sizes are 80 nm in (a) and 30 nm in (b).

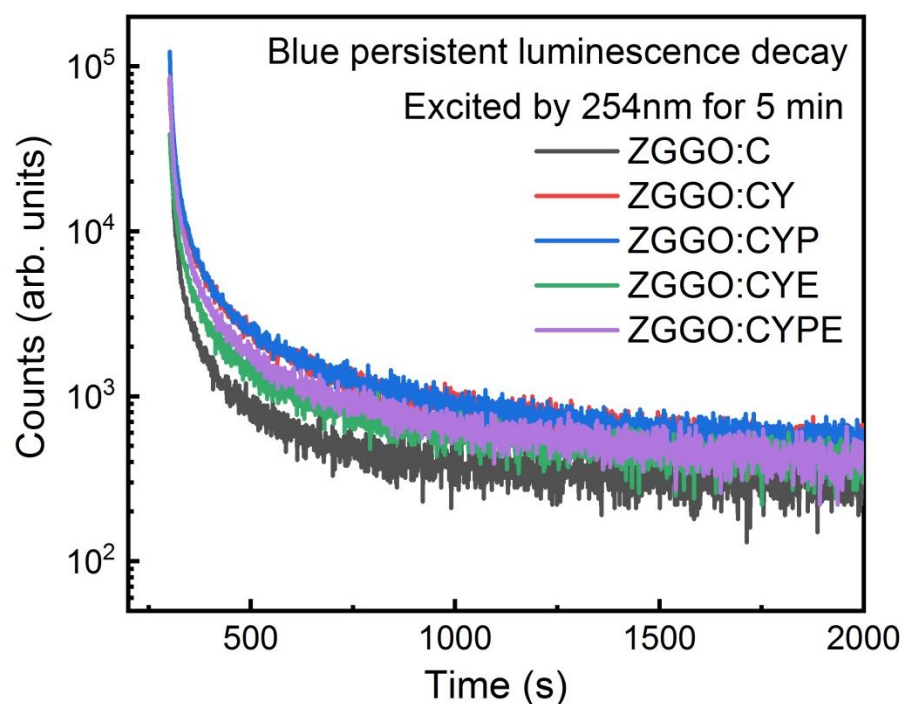

**Figure S17.** (a) Blue persistent luminescence decay curves of co-doped  $\text{Zn}_3\text{Ga}_2\text{Ge}_2\text{O}_{10}:\text{Cr}^{3+}$  (ZGGO: C) samples:  $\text{Zn}_3\text{Ga}_2\text{Ge}_2\text{O}_{10}:\text{Cr}^{3+}, \text{Yb}^{3+}$  (ZGGO: CY),  $\text{Zn}_3\text{Ga}_2\text{Ge}_2\text{O}_{10}:\text{Cr}^{3+}, \text{Yb}^{3+}, \text{Pr}^{3+}$  (ZGGO: CYP),  $\text{Zn}_3\text{Ga}_2\text{Ge}_2\text{O}_{10}:\text{Cr}^{3+}, \text{Yb}^{3+}, \text{Er}^{3+}$  (ZGGO: CYE), and  $\text{Zn}_3\text{Ga}_2\text{Ge}_2\text{O}_{10}:\text{Cr}^{3+}, \text{Yb}^{3+}, \text{Pr}^{3+}, \text{Er}^{3+}$  (ZGGO: CYPE) under 254 nm excitation for 5 min.

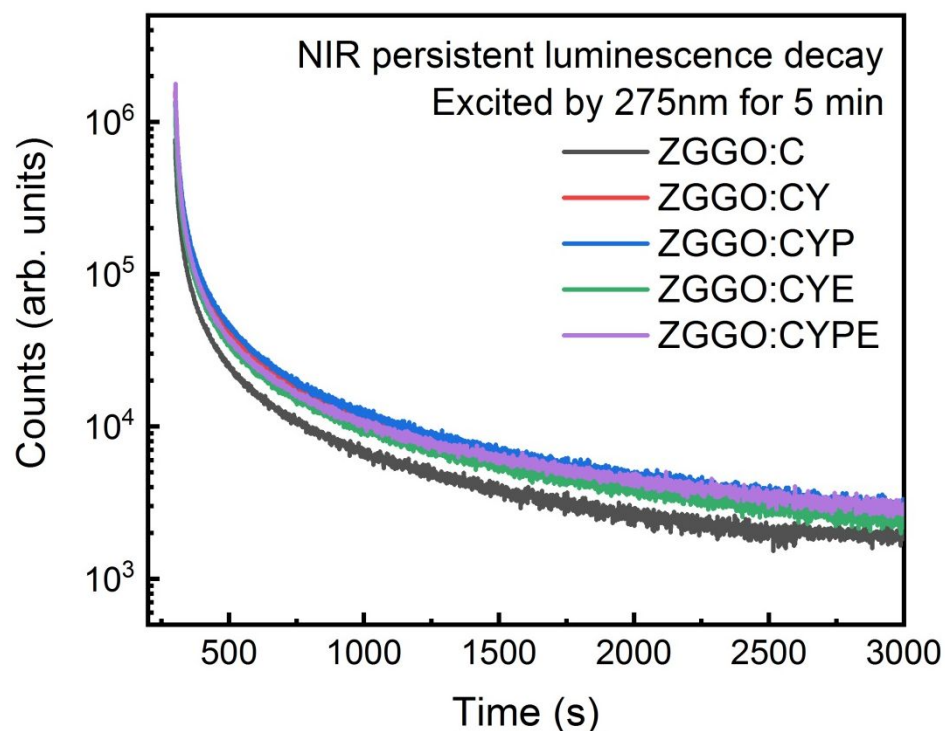

**Figure S18.** NIR persistent luminescence decay curves of co-doped ZGGO samples:  $\text{Zn}_3\text{Ga}_2\text{Ge}_2\text{O}_{10}:\text{Cr}^{3+}$  (ZGGO: C),  $\text{Zn}_3\text{Ga}_2\text{Ge}_2\text{O}_{10}:\text{Cr}^{3+}, \text{Yb}^{3+}$  (ZGGO: CY),  $\text{Zn}_3\text{Ga}_2\text{Ge}_2\text{O}_{10}:\text{Cr}^{3+}, \text{Yb}^{3+}, \text{Pr}^{3+}$  (ZGGO: CYP),  $\text{Zn}_3\text{Ga}_2\text{Ge}_2\text{O}_{10}:\text{Cr}^{3+}, \text{Yb}^{3+}, \text{Er}^{3+}$  (ZGGO: CYE), and  $\text{Zn}_3\text{Ga}_2\text{Ge}_2\text{O}_{10}:\text{Cr}^{3+}, \text{Yb}^{3+}, \text{Pr}^{3+}, \text{Er}^{3+}$  (ZGGO: CYPE) under 274 nm excitation for 5 min.

**Table S2.** Relationship between phase ratio and Ga/Ge ratio.

| Phase ratio<br>$\alpha\text{ZnGa}_2\text{O}_4-\beta\text{Zn}_2\text{GeO}_4-\gamma\text{GeO}_2$ | Ga/Ge ratio | Phase ratio<br>$\alpha\text{ZnGa}_2\text{O}_4-\beta\text{Zn}_2\text{GeO}_4-\gamma\text{GeO}_2$ | Ga/Ge ratio |
|------------------------------------------------------------------------------------------------|-------------|------------------------------------------------------------------------------------------------|-------------|
| 1-1-1                                                                                          | 1.0         | 0.2-1.4-2.2                                                                                    | 0.11        |
| 0-1-1                                                                                          | 0.0         | 0.6-1.2-1.6                                                                                    | 0.43        |
| 1-0-1                                                                                          | 2.0         | 0.4-1.3-1.9                                                                                    | 0.25        |
| 1-1-0                                                                                          | 2.0         | 0-1.5-2.5                                                                                      | 0.0         |
| 0-1-0                                                                                          | 0.0         | 1.4-0.8-0.4                                                                                    | 2.33        |
| 1-0-0                                                                                          | $\infty$    | 1.6-0.7-0.1                                                                                    | 4.0         |
| 1.2-0.9-0.7                                                                                    | 1.5         | 0.8-1.1-1.3                                                                                    | 0.67        |

**Table S3.** Summary of defect sites found or inferred to be present in ZGGO :Cr<sup>3+</sup>

| Type of defect site                                                                                                                                        | Evidence                                                                                                                                                                                                                                                                                                                                                                              |
|------------------------------------------------------------------------------------------------------------------------------------------------------------|---------------------------------------------------------------------------------------------------------------------------------------------------------------------------------------------------------------------------------------------------------------------------------------------------------------------------------------------------------------------------------------|
| $Ga_{Zn}^{\bullet}$ and $Zn_{Ga}'$ antisite defects                                                                                                        | These are well-documented for the spinel structure. <sup>S6-S8</sup>                                                                                                                                                                                                                                                                                                                  |
| Oxygen vacancy ( $V_O^{\bullet}$ ) and interstitial zinc ( $Zn_i^{\bullet}$ ) with germanium vacancy ( $V_{Ge}$ ) or zinc vacancy ( $V_{Zn}'$ ) acceptors. | Well documented in spinels. <sup>S9-S12</sup>                                                                                                                                                                                                                                                                                                                                         |
| Donor (e.g. $V_O^{\bullet}$ ) – acceptor (e.g. $(V_O - V_{Ga})'$ ) recombination.                                                                          | Luminescence is enhanced with the replacement of Ga <sup>3+</sup> by Ge <sup>4+</sup> .                                                                                                                                                                                                                                                                                               |
| Oxygen vacancy ( $V_O^{\bullet}$ ).                                                                                                                        | Synthesis of ZGGO 1-1-1 in ambient and reduced atmospheres                                                                                                                                                                                                                                                                                                                            |
| $Ge_{Ga}^{\bullet}$ . The $Ga_{Zn}^{\bullet}$ and $Zn_{Ga}'$ antisite defects.                                                                             | Zn deficiencies have a greater impact upon the increase in luminescence intensity.                                                                                                                                                                                                                                                                                                    |
| Singly charged oxygen vacancy $V_O^{\bullet}$ , (type F <sup>+</sup> center)                                                                               | ESR g-factor at 1.9599.                                                                                                                                                                                                                                                                                                                                                               |
| Zinc vacancy $V_{Zn}'$ .                                                                                                                                   | ESR g-factor at 2.0109.                                                                                                                                                                                                                                                                                                                                                               |
| Singly charged oxygen vacancy $V_O^{\bullet}$ .                                                                                                            | Increasing the Ga/Ge ratio increases ESR intensity of band with g-factor at 1.9599.                                                                                                                                                                                                                                                                                                   |
| Other non-paramagnetic defect centers such as F center.                                                                                                    | ESR intensity of the $V_O^{\bullet}$ band in different samples does not follow the same pattern as the photoluminescence intensity.                                                                                                                                                                                                                                                   |
| Other types of defect center (for example, F <sub>A</sub> and F).                                                                                          | The reported decay lifetimes of oxygen vacancy defects are in the ns range. <sup>S10</sup> However, ms lifetimes have been reported for defects such as the F <sub>A</sub> center in CaO:Mg, <sup>S13</sup> and the F centers in Al <sub>2</sub> O <sub>3</sub> , YAP and YAG. <sup>S14</sup> Our measured emission decay is much longer at shorter wavelengths (Figures S11a and b). |

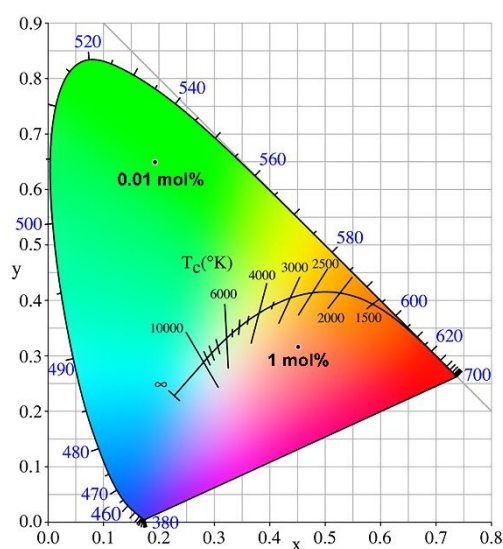

**Figure S19.** CIE diagram for samples of 1-1-1 doped with 0.01 mol% and 1.0 mol%  $\text{Cr}^{3+}$ . The two points are marked on the diagram.

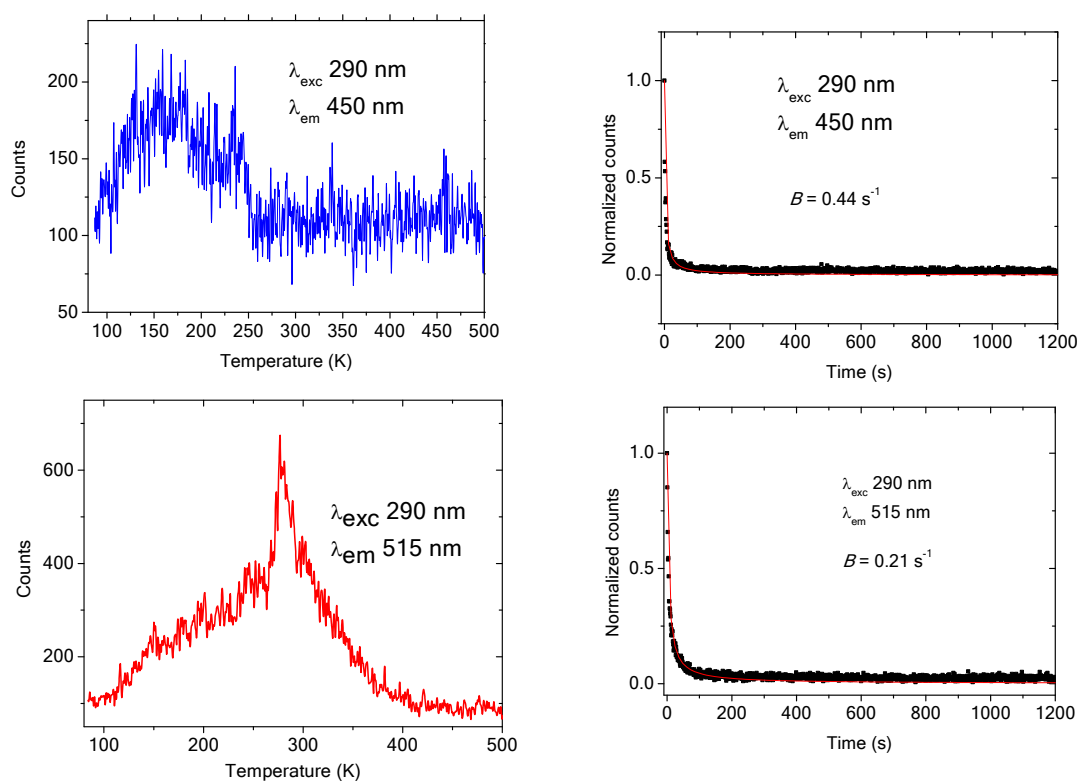

**Figure S20.** Thermoluminescence curves for undoped sample 1-1-1.

Excitation wavelength: 290nm; Emission wavelengths: 450 nm and 515 nm.  
Experiment procedure: Excitation for 10 min at 85 K.

Right hand side: persistent luminescence decay at 85 K for 20 min: the fitted values of  $B$  from hyperbolic fits are indicated;

Left hand side: the following thermoluminescence curve from 85 – 507 K.

## References

- S1. Ren, J.; Xu, X.; Zeng, H.; Chen, G.; Kong, D.; Gu, C.; Chen, C.; Liu, Z.; Kong, L.; Setlur, A. Novel Self-Activated Zinc Gallogermanate Phosphor: The Origin of Its Photoluminescence. *J. Am. Ceram. Soc.* **2014**, *97*, 3197-3201.
- S2. Ardyanian, M.; Rinnert, H.; Devaux, X.; Vergnat, M. Structure and Photoluminescence Properties of Evaporated GeO<sub>x</sub> Thin Films. *Appl. Phys. Lett.* **2006**, *89*, 011902.
- S3. Pascuta, P.; Culea, E. FTIR Spectroscopic Study of Some Bismuth Germanate Glasses Containing Gadolinium Ions. *Mater. Lett.* **2008**, *62*, 4127-4129.
- S4. Madon, M.; Gillet, Ph.; Julien, Ch.; Price, G. D. A Vibrational Study of Phase Transitions Among the GeO<sub>2</sub> Polymorphs. *Phys. Chem. Minerals* **1991**, *18*, 7-18.
- S5. Whitehead, L.; Whitehead, R.; Valeur, B.; Berberan-Santos, M. A Simple Function for the Description of Near-Exponential Decays: the Stretched or Compressed Hyperbola. *Am. J. Phys.* **2009**, *77*, 173-179.
- S6. Allix, M.; Chenu, S.; Véron, E.; Poumeyrol, T.; Kouadri-Boudjelthia, E. A.; Alahraché, S.; Porcher, F.; Massiot, D.; Fayon, F. Considerable Improvement of Long-Persistent Luminescence in Germanium and Tin Substituted ZnGa<sub>2</sub>O<sub>4</sub>. *Chem. Mater.* **2013**, *25*, 1600-1606.
- S7. Bessière, A.; Sharma, S. K.; Basavaraju, N.; Priolkar, K. R.; Binet, L.; Viana, B.; Bos, A. J. J.; Maldiney, T.; Richard, C.; Scherman, D.; Gourier, D. Storage of Visible Light for Long-Lasting Phosphorescence in Chromium-Doped Zinc Gallate. *Chem. Mater.* **2014**, *26*, 1365-1373.
- S8. De Vos, A.; Lejaeghere, K.; Vanpoucke, D. E. P.; Joos, J. J.; Smet, P. F.; Hemelsoet, K. First-Principles Study of Antisite Defect Configurations in ZnGa<sub>2</sub>O<sub>4</sub>:Cr Persistent Phosphors. *Inorg. Chem.* **2016**, *55*, 2402-2412.
- S9. Xie, Z.-Y.; Lu, H.-L.; Zhang, Y.; Sun, Q.-Q.; Zhou, P.; Ding, S.-J.; Zhang, D. W. The Electronic Structures and Optical Properties of Zn<sub>2</sub>GeO<sub>4</sub> with Native Defects. *J. Alloys Compds.* **2015**, *619*, 368-371.
- S10. Liu, Z.; Jing, X.; Wang, L. Luminescence of Native Defects in Zn<sub>2</sub>GeO<sub>4</sub>. *J. Electrochem. Soc.* **2007**, *154*, H500-H506.
- S11. Wan, M.; Wang, Y.; Wang, X.; Zhao, H.; Li, H.; Wang, C. Long Afterglow Properties of Eu<sup>2+</sup>/Mn<sup>2+</sup> Doped Zn<sub>2</sub>GeO<sub>4</sub>. *J. Lumin.* **2014**, *145*, 914-918.
- S12. Ren, J.; Xu, X.; Zeng, H.; Chen, G.; Kong, D.; Gu, C.; Chen, C.; Liu, Z.; Kong, L.; Setlur, A. Novel Self-Activated Zinc Gallogermanate Phosphor: The Origin of its Photoluminescence. *J. Am. Ceram. Soc.* **2014**, *97*, 3197-3201.

S13. Welch, L. S.; Hughes, A. E. Luminescence of the  $F_A$  Centre in CaO: Mg. *J. Phys. C: Solid State Phys.* **1980**, *13*, 5801-10.

S14. Zorenko, Y.; Zorenko, T.; Voznyak, T.; Mandowski, A.; Xia, Q.; Batentschuk, M.; Friedrich, J. Luminescence of  $F^+$  and F Centers in  $Al_2O_3$ - $Y_2O_3$  Oxide Compounds. *IOP Conf. Ser.: Mater. Sci. Eng.* **2010**, *15*, 012060.
